# Supplementary material
Source: Springer Nature journal article supplement (https://www.springermedizin.de/resource/supplementary/13075_2013_4086_MOESM4_ESM.pdf/9695992)

*Adiponectin*

*Leptin*

*Visfatin*

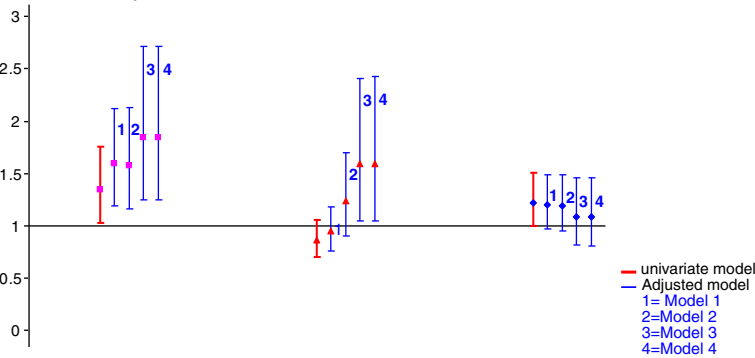

Supplement: MOESM4 [file 9695992]
